# Supplementary material
Source: ML conference proceedings conference paper supplement (https://proceedings.neurips.cc/paper_files/paper/2018/hash/21ce689121e39821d07d04faab328370-Abstract.html)
Supplement: Supplementary file [file 21ce689121e39821d07d04faab328370-Supplemental.zip]

## A Proof of biased SGD

The proof is similar to the SGD proof of [16], however we account for bias in gradient estimates. Define the random variable  $\delta_t \triangleq \tilde{g}_t(w_t) - \nabla F(w_{t-1})$ . By the definitions of  $L$  and  $\gamma$ ,

$$\begin{aligned} F(w_{t+1}) - F(w_t) &\leq \nabla F(w_t)^T (w_{t+1} - w_t) + \frac{L}{2} \|w_{t+1} - w_t\|^2 \\ &\leq -\nabla F(w_t)^T (\gamma \tilde{g}_t(w_t)) + \gamma^2 \frac{L}{2} \|\tilde{g}_t(w_t)\|^2 \\ &\leq -\gamma(1 - \frac{\gamma L}{2}) \|\nabla F(w_t)\|^2 + \gamma(1 - \gamma L) \|\nabla F(w_t)\| \|\delta_t\| + \gamma^2 \frac{L}{2} \|\delta_t\|^2, \end{aligned}$$

where the last inequality uses the fact that  $\gamma L \leq 1$ . Rearranging the above inequality and summing over all  $t$  we get that

$$\begin{aligned} &\mathbb{E}_{t \in \text{Uniform}(T)} [\|\nabla F(w_t)\|^2] \\ &\leq \frac{1}{T\gamma(2 - \gamma L)} (2(F(w_0) - F(w^*)) + T\gamma^2 L \mathbb{E} \|\delta_t\|^2) + \frac{2\gamma(1 - \gamma L)}{\gamma(2 - \gamma L)} \left( \frac{1}{T} \sum_{t=1}^T \|\nabla F(w_t)\| \|\mathbb{E}[\delta_t]\| \right) \\ &\leq \frac{1}{T\gamma(2 - \gamma L)} (2D_F + T\gamma^2 L \sigma^2) + \frac{2\gamma(1 - \gamma L)}{\gamma(2 - \gamma L)} DB \\ &\leq \frac{2D_F}{T} \max \left\{ L, \frac{\sigma \sqrt{LT}}{\sqrt{2D_F}} \right\} + \frac{\sigma \sqrt{2LD_F}}{\sqrt{T}} + DB \\ &\leq \frac{2D_F L}{T} + \frac{2\sqrt{2LD_F} \sigma}{\sqrt{T}} + DB. \end{aligned}$$

## B Binomial Mechanism - Proof of Theorem 1

To remind the reader, the binomial mechanism for releasing discrete valued queries on a database is defined as follows. Given a set of databases  $\mathcal{D}$  and an integer valued query  $f : \mathcal{D} \rightarrow \mathbb{Z}^d$ , the binomial mechanism samples a vector  $Z \in \mathbb{Z}^d$  such that all its coordinates are distributed as the binomial distribution with parameters  $N, p$ , i.e.

$$Z(j) \sim \text{Bin}(N, p)$$

The Binomial mechanism releases the vector  $s(Z - Np) + f(D)$  as the output to the query. For the analysis the reader is referred to the definition of  $\ell_q$  norm sensitivity  $\Delta_q$  for any  $q > 0$  defined in (4). The  $q$  of interest to us for the Binomial mechanism will be  $q = \{1, 2, \infty\}$ . Since our requirement from the Binomial mechanism will be symmetric w.r.t.  $p$  and  $1 - p$ , throughout this proof, we assume that  $p \leq 1/2$ .

To prove Theorem 1, we need few auxiliary lemmas. We first state two inequalities which we use throughout the proof.

**Lemma 2** (Bernstein's inequality). *Let  $X_1, X_2, \dots, X_n$  be independent random variables such that  $E[X_i] = 0$  and  $|X_i| \leq M$  w.p. 1. Let  $\sigma_i^2 \triangleq \mathbb{E}[X_i^2]$ . Then for any  $\delta \geq 0$ ,*

$$\Pr \left( \sum X_i \geq \sqrt{2 \sum \sigma_i^2 \log \frac{1}{\delta}} + \frac{2}{3} \cdot M \log \frac{1}{\delta} \right) \leq \delta.$$

**Lemma 3** (Efron-Stein inequality). *Let  $f$  be a symmetric function of  $n$  independent random variables  $X_1, X_2, \dots, X_n$ . Let  $X'_1$  be an i.i.d. copy of  $X_1$ , then*

$$\text{Var}(f) \leq \frac{n}{2} \cdot \mathbb{E} [(f(X_1, X_2, \dots, X_n) - f(X'_1, X_2, \dots, X_n))^2].$$

We use the above two results in the next two lemmas.

**Lemma 4.** *Let  $T \sim \text{Bin}(N, p)$ ,  $i \in [0, N]$ ,  $t \in \mathbb{Z}$ ,  $i - t \in [0, N]$ . Then*

$$\frac{\Pr(T = i - t)}{\Pr(T = i)} \leq \exp \left( t \cdot \log \frac{(i + 1)(1 - p)}{(N - i + 1)p} \right)$$

*Proof.*

$$\begin{aligned}
\frac{\Pr(T = i - t)}{\Pr(T = i)} &\triangleq \frac{\binom{N}{i-t} p^{i-t} (1-p)^{N-i+t}}{\binom{N}{i} p^i (1-p)^{N-i}} \\
&= \frac{i!(N-i)!}{(i-t)!(N-i+t)!} \left( \frac{1-p}{p} \right)^t \\
&\leq \left( \frac{(i+1)(1-p)}{(N-i+1)p} \right)^t,
\end{aligned}$$

where the inequality follows from considering the two cases when  $t$  can be positive or negative.  $\square$

**Lemma 5.** Let  $t_1, t_2, \dots, t_d$  be  $d$  real numbers. Let  $v_i \sim \text{Bin}(N, p)$  independently such that  $Np(1-p) \geq 39$ . Let  $A$  be the event that  $\|v_i - Np\|_\infty \leq \beta$  for some  $\beta$ , such that  $\beta \leq N \min(p, 1-p)/3$ . Then for any  $\delta$ , with probability  $\geq 1 - \delta$  conditioned on  $A$ ,

$$\begin{aligned}
&\sum_{i=1}^d t_i \left( \log \frac{(v_i+1)(1-p)}{(N-v_i+1)p} - \frac{v_i+1}{Np} + \frac{N-v_i+1}{N(1-p)} \right) \\
&\leq \frac{2\|t\|_1(p^2 + (1-p)^2)}{3Np(1-p)(\Pr(A))} + \frac{\|t\|_2 c_p}{Np(1-p)\sqrt{\Pr(A)}} \cdot \sqrt{\log \frac{1}{\delta}} + \frac{4\|t\|_\infty(\beta+1)^2(p^2 + (1-p)^2)}{9N^2p^2(1-p)^2} \log \frac{1}{\delta},
\end{aligned}$$

where  $c_p$  is given by

$$c_p \triangleq \sqrt{2}(3p^3 + 3(1-p)^3 + 2p^2 + 2(1-p)^2). \quad (11)$$

*Proof.* Since  $\beta \leq N \min(p, 1-p)/3$  and for any  $z \geq -1/3$ ,  $|\log(1+z) - z| \leq 1.95z^2/3$ ,

$$\begin{aligned}
&\left| \log \frac{(v_i+1)(1-p)}{(N-v_i+1)p} - \frac{v_i+1}{Np} + \frac{N-v_i+1}{N(1-p)} \right| \\
&\leq \frac{1.95}{3} \left| \frac{v_i+1-Np}{Np} \right|^2 + \frac{1.95}{3} \left| \frac{N-v_i+1-N-Np}{N(1-p)} \right|^2.
\end{aligned}$$

Hence we can bound the expectation as

$$\begin{aligned}
&\mathbb{E} \left[ \log \frac{(v_i+1)(1-p)}{(N-v_i+1)p} - \frac{v_i+1}{Np} + \frac{N-v_i+1}{N(1-p)} \middle| A \right] \\
&\leq \mathbb{E} \left[ \frac{1.95}{3} \left| \frac{v_i+1-Np}{Np} \right|^2 + \frac{1.95}{3} \left| \frac{N-v_i+1-N-Np}{N(1-p)} \right|^2 \middle| A \right] \\
&\stackrel{(a)}{\leq} \frac{1}{\Pr(A)} \cdot \mathbb{E} \left[ \frac{1.95}{3} \left| \frac{v_i+1-Np}{Np} \right|^2 + \frac{1.95}{3} \left| \frac{N-v_i+1-N-Np}{N(1-p)} \right|^2 \right] \\
&\stackrel{(b)}{\leq} \frac{1}{\Pr(A)} \cdot \frac{2(p^2 + (1-p)^2)}{3Np(1-p)},
\end{aligned}$$

Where (a) uses the fact that for any positive random variable  $X$  and any event  $A$ ,  $\mathbb{E}[X] \geq \Pr(A)\mathbb{E}[X|A]$ . (b) uses the fact that  $Np(1-p) \geq 39$ . Note that the function we are considering is a sum of functions of  $d$  independent binomial random variables and hence we can apply Bernstein' inequality. To this end, we bound  $\sigma_i^2$  and  $M$ . Since  $\|v_i - Np\|_\infty$  is bounded,

$$\begin{aligned}
\left| \log \frac{(v_i+1)(1-p)}{(N-v_i+1)p} - \frac{v_i+1}{Np} + \frac{N-v_i+1}{N(1-p)} \right| &\leq \frac{2}{3} \left| \frac{v_i+1-Np}{Np} \right|^2 + \frac{2}{3} \left| \frac{N-v_i+1-N-Np}{N(1-p)} \right|^2 \\
&\leq \frac{2(\beta+1)^2(p^2 + (1-p)^2)}{3N^2p^2(1-p)^2},
\end{aligned}$$

where the first inequality follows from the fact that  $\beta \leq N \min(p, 1-p)/3$  and for any  $z \geq -1/3$ ,  $|\log(1+z) - z| \leq 2z^2/3$ . Hence we can set  $M = \frac{2(\beta+1)^2(p^2 + (1-p)^2)}{3N^2p^2(1-p)^2}$ . We now bound the variance:

$$\text{Var} \left( \sum_{i=1}^d t_i \cdot \log \frac{(v_i+1)(1-p)}{(N-v_i+1)p} - \frac{v_i+1}{Np} + \frac{N-v_i+1}{N(1-p)} \middle| A \right).$$

We now bound  $\sigma_i^2$ . Observe that the term corresponding to  $i$ , is a function of  $n$  independent Bernoulli  $p$  random variables  $X_i(j)$ , for  $1 \leq j \leq d$ . We bound the expected square change in the function for any of these variables  $X_i(j)$  and then use Efron-Stein inequality. Let  $\mathbb{E}_A$  denote the expectation conditioned on the event  $A$ . Without loss of generality we first consider the contribution of the term  $X_i(j)$ . Let  $w = \sum_{j' \neq j} X_i(j')$ , then

$$\begin{aligned}
& \mathbb{E}_A \left[ t_i \cdot \log \frac{(v_i + 1)(1-p)}{(N - v_i + 1)p} - \frac{v_i + 1}{Np} + \frac{N - v_i + 1}{N(1-p)} - t_i \cdot \log \frac{(v'_i + 1)(1-p)}{(N - v'_i + 1)p} - \frac{v'_i + 1}{Np} + \frac{N - v'_i + 1}{N(1-p)} \right]^2 \\
&= t_i^2 \mathbb{E}_A \left[ \cdot \log \frac{(w + X_i(j) + 1)(1-p)}{(N - w - X_i(j) + 1)p} - \frac{w + X_i(j) + 1}{Np} + \frac{N - w - X_i(j) + 1}{N(1-p)} \right] \\
&- t_i^2 \mathbb{E}_A \left[ \cdot \log \frac{(w + X'_i(j) + 1)(1-p)}{(N - w - X'_i(j) + 1)p} - \frac{w + X'_i(j) + 1}{Np} + \frac{N - w - X'_i(j) + 1}{N(1-p)} \right]^2 \\
&\stackrel{(a)}{=} 2t_i^2 p(1-p) \mathbb{E}_A \left[ \log \left( 1 + \frac{1}{w+1} \right) + \log \left( 1 + \frac{1}{N-w} \right) - \frac{1}{Np} - \frac{1}{N(1-p)} \right]^2 \\
&\stackrel{(b)}{\leq} 2t_i^2 p(1-p) \mathbb{E} \left[ \log \left( 1 + \frac{1}{w+1} \right) + \log \left( 1 + \frac{1}{N-w} \right) - \frac{1}{Np} - \frac{1}{N(1-p)} \right]^2 \cdot \frac{1}{\Pr(A)} \\
&= 2t_i^2 p(1-p) \mathbb{E} \left[ \log \left( 1 + \frac{1}{w+1} \right) + \log \left( 1 + \frac{1}{N-w} \right) - \frac{1}{Np(1-p)} \right]^2 \cdot \frac{1}{\Pr(A)},
\end{aligned}$$

where (a) uses the fact that the term is non-zero only if  $X_i(j) = 1, X'_i(j) = 0$  or  $X_i(j) = 0, X'_i(j) = 1$  and the probability of this event is  $2p(1-p)$ . (b) uses the fact that for any positive random variable  $X$  and any event  $A$ ,  $\mathbb{E}[X] \geq \Pr(A)\mathbb{E}[X|A]$ . We first upper bound the term inside the expectation:

$$\begin{aligned}
& \left( \log \left( 1 + \frac{1}{w+1} \right) + \log \left( 1 + \frac{1}{N-w} \right) - \frac{1}{Np(1-p)} \right)^2 \\
&= \left( \log \left( 1 + \frac{1}{w+1} \right) + \log \left( 1 + \frac{1}{N-w} \right) \right)^2 + \frac{1}{N^2 p^2 (1-p)^2} - \\
&\quad \frac{2}{Np(1-p)} \left( \log \left( 1 + \frac{1}{w+1} \right) + \log \left( 1 + \frac{1}{N-w} \right) \right) \\
&\leq \frac{1}{(w+1)^2} + \frac{1}{(N-w)^2} + \frac{2}{w(N-w)} + \frac{1}{N^2 p^2 (1-p)^2} - \\
&\quad \frac{2}{Np(1-p)} \left( \frac{1}{w+1} - \frac{1}{2(w+1)^2} + \frac{1}{N-w} - \frac{1}{2(N-w)^2} \right) \\
&= \frac{1}{(w+1)(w+2)} - \frac{2}{Np(1-p)} \frac{1}{w+1} + \frac{1}{(N-w)(N-w+1)} - \frac{2}{Np(1-p)} \frac{1}{N-w} \\
&\quad + \frac{2}{w(N-w)} \\
&\quad + \frac{1}{(w+1)^2(w+2)} + \frac{1}{(N-w)^2(N-w+1)} + \frac{1}{Np(1-p)} \left( \frac{1}{(w+1)^2} + \frac{1}{(N-w)^2} \right) \\
&\quad + \frac{1}{N^2 p^2 (1-p)^2},
\end{aligned}$$

where the inequality uses the fact that for any positive  $x$ ,  $x - x^2/2 \leq \log x \leq x$ . Observe that  $w \sim \text{Bin}(n-1, p)$  and  $N-1-w \sim \text{Bin}(n-1, 1-p)$ . We use the following three inequalities, to bound the expectation of the term above. Similar results apply for  $N-w$  as  $N-1-w \sim \text{Bin}(n-1, 1-p)$ . Since  $1/w$  and  $1/(N-w)$  are negatively correlated,

$$\mathbb{E} \left[ \frac{1}{w(N-w)} \right] \leq \mathbb{E} \left[ \frac{1}{w} \right] \cdot \mathbb{E} \left[ \frac{1}{N-w} \right].$$

Furthermore, for any  $i$

$$\mathbb{E} \left[ \frac{w!}{(w+i)!} \right] \leq \frac{1}{(Np)^i}$$

and if  $Np(1-p) \geq 2$ ,

$$\mathbb{E} \left[ \frac{1}{(w+1)(w+2)} - \frac{2}{Np(1-p)} \frac{1}{w+1} \right] \leq \frac{1}{(Np)^2} - \frac{2}{N^2p^2(1-p)}.$$

Combining the above results and simplifying the terms, we get that the expectation of the required quantity is bounded by

$$= \frac{1}{N^3p^3(1-p)^3} \cdot (3p^3 + 3(1-p)^3 + 2p^2 + 2(1-p)^2).$$

Hence  $\sigma_i^2$  is bounded by

$$\frac{1}{\Pr(A)} \cdot \frac{t_i^2}{N^2p^2(1-p)^2} \cdot (3p^3 + 3(1-p)^3 + 2p^2 + 2(1-p)^2),$$

and the lemma follows by Bernstein's inequality.  $\square$

*Proof of Theorem 7* Firstly note that it is sufficient to consider the differential privacy of the quantity  $\frac{f(D)}{s} + Z$  where  $Z$  is a Binomial random variable. Note that since  $s$  is defined to be  $1/j$  for some integer  $j$  the output  $f(D)/s$  remains integral. Further note that in this setting the  $l_q$  norm sensitivity scales  $\Delta_q/s$ . The above reduction shows that the scale  $s$  can be considered to be 1 in the rest of the proof.

Consider any two neighboring data sets  $D_1, D_2$  and let  $\Delta \triangleq f(D_2) - f(D_1)$ . Note that showing the  $(\epsilon, \delta)$  differential privacy of the Binomial mechanism is equivalent to showing the following. Let  $T$  be a vector such that  $T(j) \sim \text{Bin}(N, p)$  then for any vector  $v \in [N]^d$  we have that

$$\Pr(T = v) \leq e^\epsilon \Pr(T = v - \Delta) + \delta$$

To show the above we will first define a set  $V$  such that

$$\Pr(T \in V) \geq 1 - \delta,$$

and for every element  $v \in V$ ,

$$\Pr(T = v) \leq e^\epsilon \Pr(T = v - \Delta).$$

Define  $V$  as follows:  $v \in V$  if and only if,

$$\|v - Np\|_\infty \leq \beta \triangleq \sqrt{2Np(1-p) \log(20d/\delta)} + \frac{2}{3} \max(p, 1-p) \log \frac{20d}{\delta}. \quad (12)$$

$$|\Delta \cdot (v - Np)| \leq \|\Delta\|_2 \sqrt{2Np(1-p) \log(1.25/\delta)} + \frac{2}{3} \log(1.25/\delta) \|\Delta\|_\infty. \quad (13)$$

$$\forall j, v(j) - \Delta(j) \in [0, N] \text{ and } v(j) \in Np \pm Np(1-p)/3.$$

$$\begin{aligned} \sum_{i=1}^d \Delta(j) \cdot \left( \log \frac{(v(j)+1)(1-p)}{p(N-v(j)+1)} - \frac{v(j)+1}{Np} + \frac{N-v(j)+1}{N(1-p)} \right) &\leq \frac{2\|\Delta\|_1(p^2 + (1-p)^2)}{3Np(1-p)(1-\delta/10)} \\ &+ \frac{\|\Delta\|_2 c_p}{Np(1-p)\sqrt{1-\delta/10}} \cdot \sqrt{\log \frac{10}{\delta}} + \frac{4\|\Delta\|_\infty(\beta+1)^2(p^2 + (1-p)^2)}{9N^2p^2(1-p)^2} \log \frac{10}{\delta}. \end{aligned} \quad (14)$$

We will first show that the probability of this event is large.

The first condition follows from Bernstein's inequality with probability  $\geq 1 - \delta/10$ . For the second condition, observe that  $\Delta \cdot (s - Np)$  is a function of  $Nd$  independent random variables. A direct application of Bernstein's inequality yields that Equation (13) holds with probability  $\geq 1 - \delta/1.25$ . The third condition follows from the first condition as  $\|\Delta\|_\infty \leq Np - \beta$  and  $Np(1-p)/3 \geq \beta$ . Applying Lemma 5 with  $A$  being event that  $\|v - Np\|_\infty \leq \beta$  and  $\delta = \delta/10$ , yields that the fourth equation holds with probability at least  $1 - \delta/10$ . Hence, by the union bound,

$$\Pr(T \notin V) \leq \delta.$$

We now prove the ratio of probabilities. For any  $v$ ,

$$\begin{aligned}
& \frac{\Pr(T = v - \Delta)}{\Pr(T = v)} \\
&= \prod_{i=1}^d \frac{\Pr(T(j) = v(j) - \Delta(j))}{\Pr(T(j) = v(j))} \\
&\leq \exp \left( \sum_{i=1}^d \Delta(j) \cdot \log \frac{(v(j) + 1)(1 - p)}{p(N - v(j) + 1)} \right) \\
&= \exp \left( \sum_{i=1}^d \frac{\Delta(j)(v(j) - Np)}{Np(1 - p)} + \sum_{i=1}^d \Delta(j) \cdot \left( \log \frac{(v(j) + 1)(1 - p)}{p(N - v(j) + 1)} - \frac{v(j) + 1}{Np} + \frac{N - v(j) + 1}{N(1 - p)} \right) \right. \\
&\quad \left. + \frac{\sum_{j=1}^d \Delta(j)(1 - 2p)}{Np(1 - p)} \right)
\end{aligned}$$

where the inequality follows from Lemma 4. Since  $v \in V$ , applying Equations (12), (13), (14) together with the fact that  $\beta \leq \sqrt{2.5Np(1 - p) \log(20d/\delta)}$  (by the assumptions in the theorem) yields the following bound on the exponent.

$$\begin{aligned}
& \|\Delta\|_2 \cdot \sqrt{\frac{2 \log \frac{1.25}{\delta}}{Np(1 - p)}} + \frac{2\|\Delta\|_\infty}{3Np(1 - p)} \log \frac{1.25}{\delta} + \frac{\|\Delta\|_2 c_p \sqrt{\log \frac{10}{\delta}}}{Np(1 - p) \sqrt{1 - \delta/10}} + \frac{\|\Delta\|_\infty d_p \log \frac{20d}{\delta} \log \frac{10}{\delta}}{Np(1 - p)} \\
& \quad + \frac{b_p \|\Delta\|_1}{Np(1 - p)(1 - \delta/10)},
\end{aligned}$$

where  $c_p$  is defined in Equation (11) and

$$d_p \triangleq \frac{4}{3} \cdot (p^2 + (1 - p)^2) \quad (15)$$

and

$$b_p \triangleq \frac{2(p^2 + (1 - p)^2)}{3} + (1 - 2p). \quad (16)$$

□

## C High probability sensitivity

To describe our main lemma formally we need the following definition. Let  $Q \triangleq \{q_i \in \mathbb{N}\}$  represent a set of natural numbers and  $\Delta_Q \triangleq \{\Delta_{q_i}\}$  represent a subset of real numbers. For two random vectors  $v_1, v_2$ , the event  $\|v_1 - v_2\|_Q \leq \Delta_Q$  is defined as

$$(\|v_1 - v_2\|_Q \leq \Delta_Q) \triangleq \bigcup_i (\|v_1 - v_2\|_{q_i} \leq \Delta_{q_i})$$

**Definition 1** ( $(\Delta_Q, \delta)$  sensitivity). *Given a set of integers  $Q$  and values  $\Delta_Q, \delta$ , we call a randomized function  $f : \mathcal{D} \rightarrow \mathcal{X}$ ,  $(\Delta_Q, \delta)$  sensitive, if for any two neighboring data sets  $D_1, D_2 \in \mathcal{N}_{\mathcal{D}}$ , there exist coupled random variables  $X_1, X_2 \in \mathcal{X}$  such that the marginal distributions of  $X_1, X_2$  are identical to that of  $f(D_1)$  and  $f(D_2)$  and*

$$\Pr_{X_1, X_2} (\|X_1 - X_2\|_Q \leq \Delta_Q) \geq 1 - \delta. \quad (17)$$

We show the following result for high-probability sensitivity and the proof is provided in Appendix C

**Lemma 6.** *Let  $\mathcal{M} : \mathcal{D} \rightarrow \mathcal{O}$  be an  $(\varepsilon, \delta)$  differentially private mechanism for sensitivity  $\Delta_Q$  and let  $f : \mathcal{D} \rightarrow \mathcal{X}$  be a  $(\Delta_Q, \delta')$  sensitive function. Then the composed mechanism  $\mathcal{M}(f(D))$  is  $(\varepsilon, \delta + \delta')$  differentially private.*

*Proof.* To show  $(\varepsilon, \delta + \delta')$  differential privacy we need to show that for any two neighboring data sets  $D_1, D_2$  and  $O \subseteq \mathcal{O}$ ,

$$\Pr(\mathcal{M}(f(D_1)) \in O) \leq e^\varepsilon \Pr(\mathcal{M}(f(D_2)) \in O) + \delta + \delta'.$$

Given any two neighboring data sets  $D_1, D_2$  let  $\Pr_{\Delta_Q, \delta}(X_1, X_2)$  represent the joint distribution of the coupled random variables  $X_1, X_2$  guaranteed by Definition [11](#). Now for any  $O \in \mathcal{O}$  we have that

$$\begin{aligned} \Pr(\mathcal{M}(f(D_1)) \in O) &\triangleq \int_{s \in \mathcal{S}} \Pr(f(D_1) = s) \Pr(\mathcal{M}(s) \in O) \\ &\stackrel{(a)}{=} \left( \int_{s_1, s_2 \|s_1 - s_2\|_Q \leq \Delta_Q} \Pr_{\Delta_Q, \delta}(s_1, s_2) (\Pr(\mathcal{M}(s_2) \in O)) \right) \\ &\quad + \left( \int_{s_1, s_2 \|s_1 - s_2\|_Q \geq \Delta_Q} \Pr_{\Delta_Q, \delta}(s_1, s_2) (\Pr(\mathcal{M}(s_2) \in O)) \right) \\ &\stackrel{(b)}{=} \left( \int_{s_1, s_2 \|s_1 - s_2\|_Q \leq \Delta_Q} \Pr_{\Delta_Q, \delta}(s_1, s_2) (\Pr(\mathcal{M}(s_2) \in O)) \right) + \delta \\ &\stackrel{(c)}{\leq} \left( \int_{s_1, s_2 \|s_1 - s_2\|_Q \leq \Delta_Q} \Pr_{\Delta_Q, \delta}(s_1, s_2) (e^\varepsilon \Pr(\mathcal{M}(s_2) \in O) + \delta) \right) + \delta' \\ &\stackrel{(d)}{\leq} e^\varepsilon \left( \int_{s \in \mathcal{S}} \Pr(f(D_2) = s) \Pr(\mathcal{M}(s) \in O) \right) + \delta + \delta' \\ &\triangleq e^\varepsilon \Pr(\mathcal{M}(f(D_2)) \in O) + \delta + \delta'. \end{aligned}$$

In the above (a), (d) follow from the fact that  $\Pr_{\Delta_Q, \delta}$  is a coupling, (b) follows from the condition [\(17\)](#) guaranteed by the coupling and (c) follows from the  $(\varepsilon, \delta)$  differential privacy guarantee of the mechanism  $\mathcal{M}$ .  $\square$

## D Application of Binomial Mechanism to Distributed Mean Estimation - Proof of Theorem [3](#)

*Proof of Theorem [3](#)* We refer the readers to the definition of the protocol (Section [4.2](#)) and in particular the definitions of the random variables  $U_i, T_i$ , and the estimator  $\hat{X}_{\pi_{sk}(\text{Bin}(m, p))}$  given in equations [\(8\)](#) and [\(9\)](#) respectively.

The communication complexity follows immediately by noting that the protocol only transmits integers in the range  $[0, k + m)$  and therefore only needs  $\log(k + m)$  bits. We now prove the bound on the Mean Square Error of the protocol and then prove the sensitivity guarantee.

### Mean Square Error

$$\begin{aligned} \|\hat{X} - \bar{X}\|_2^2 &= \frac{1}{n^2} \sum_{j=1}^d \sum_{i=1}^n \mathbb{E}[(\hat{X}_i(j) - X_i(j))^2] \\ &\leq \frac{1}{n^2} \sum_{j=1}^d \sum_{i=1}^n \mathbb{E} \left[ \left( \frac{2X^{\max}}{k-1} \right)^2 (\text{Var}(\text{Ber}(p_i(j))) + \text{Var}(\text{Bin}(mp))) \right] \\ &\leq (2X^{\max})^2 \left( \frac{d}{4n(k-1)^2} + \frac{d}{n^2} \frac{mnp(1-p)}{(k-1)^2} \right), \end{aligned}$$

where the equality follows from the fact that  $\hat{X}_i(j)$  are independent of each other and  $\hat{X}$  is an unbiased estimator of  $\bar{X}$ . Setting  $m, p, k$  as defined in the theorem proves the bound on MSE.

### Differential Privacy

Given two neighboring data sets  $X \triangleq \{X_1 \dots X_n\}$  and  $X_{\otimes n} \triangleq \{X'_1 \dots X'_n\}$  (where  $X'_i = X_i$

for  $i \in [1, n-1]$ ) we will first provide a high probability bound on the  $\ell_1, \ell_2, \ell_\infty$  sensitivity of quantization protocol  $\pi_{sk}$ . In particular the following lemma provides the high probability sensitivity bounds.

**Lemma 7.** *For every  $\delta$ , given two neighboring data sets  $X \triangleq \{X_1 \dots X_n\}$  and  $X_{\otimes n} \triangleq \{X'_1 \dots X'_n\}$  (where  $X'_i = X_i$  for  $i \in [1, n-1]$ ) we have that the protocol  $\pi_{sk}$  is  $(\{\Delta_1, \Delta_2, \Delta_\infty\}, \delta)$ -sensitive (c.f. Definition 7) where  $\Delta_1, \Delta_2, \Delta_\infty$  satisfy the following equations.*

$$\Delta_\infty \leq \frac{\|X_n - X'_n\|_\infty}{2X^{\max}/(k-1)} + 2 \quad (18)$$

$$\Delta_1 \leq \frac{\|X_n - X'_n\|_1}{2X^{\max}/(k-1)} + \sqrt{2 \frac{\|X_n - X'_n\|_1 \log(2/\delta)}{2X^{\max}/(k-1)}} + \frac{4}{3} \log(2/\delta) \quad (19)$$

$$\Delta_2 \leq \frac{\|X_n - X'_n\|_2}{2X^{\max}/(k-1)} + \sqrt{\frac{\|X_n - X'_n\|_1}{2X^{\max}/(k-1)} + \sqrt{\frac{8\|X_n - X'_n\|_1 \log(2/\delta)}{2X^{\max}/(k-1)}} + \frac{4}{3} \log(2/\delta)}. \quad (20)$$

Further we note that the protocol  $\pi_{sk}(\text{Bin}(m, p))$  is a composition of the binomial mechanism and the protocol  $\pi_{sk}$ . A direct application of Theorem 1 and Lemma 6 gives us that the mechanism  $\pi_{sk}(\text{Bin}(m, p))$  is  $(\varepsilon, 2\delta)$  differentially private for any  $\delta \in (0, 1)$  and  $\varepsilon$  satisfying the below conditions. 7 Note that the conditions required by Theorem 1 can be verified from the given conditions in Theorem 3.  $\square$

We now provide a proof of Lemma 7.

*Proof of Lemma 7.* To this end we recall the definition of the random variables  $U_i(j)$ . Given  $X^{\max}$  and  $X^{\min}$  we associate to every integer  $r$  in  $[0, k]$  a bin  $B(r)$  defined as

$$B(r) \triangleq -X^{\max} + \frac{2rX^{\max}}{k-1}$$

Further given a number  $X \in [-X^{\max}, X^{\max}]$ , let  $r(X)$  be the integer such that  $X \in [B(r(X)), B(r(X)+1)]$ . We can now define the random variable

$$U(X) = \begin{cases} r(X) + 1 & \text{w.p. } \frac{X - B(r(X))}{B(r(X)+1) - B(r(X))} \\ r(X) & \text{otherwise.} \end{cases}$$

Now define the random variables  $U_i^X(j) \triangleq U(X_i(j))$  and similarly  $U_i^{X_{\otimes n}}(j) \triangleq U(X'_i(j))$ . To provide high probability sensitivity bounds in accordance with Lemma 6, we need to define a coupling between the random variables  $\sum_i U_i^X$  and  $\sum_i U_i^{X_{\otimes n}}$ . To do the above we will define a coupling between the random variables  $U_i^X(j)$  and  $U_i^{X_{\otimes n}}(j)$ . The coupled random variables will be sampled as follows.

The defined coupling will have two cases. Define the set  $S = \{(i, j) | r(X_i(j)) = r(X'_i(j))\}$ . We first consider the case when  $(i, j) \in S$ . In this case we sample a random variable  $\alpha_{ij} \in [0, 1]$  uniformly at random and define the random variables

$$Y_i(j) = \begin{cases} r(X_i(j)) + 1 & \text{if } \alpha_{ij} \leq \frac{X_i(j) - B(r(X_i(j)))}{B(r(X_i(j))+1) - B(r(X_i(j)))} \\ r(X_i(j)) & \text{otherwise.} \end{cases}$$

$$Y_i^{\otimes n}(j) = \begin{cases} r(X'_i(j)) + 1 & \text{if } \alpha_{ij} \leq \frac{X'_i(j) - B(r(X'_i(j)))}{B(r(X'_i(j))+1) - B(r(X'_i(j)))} \\ r(X'_i(j)) & \text{otherwise,} \end{cases}$$

<sup>7</sup>we choose  $\delta, \delta'$  as  $\delta$  in the application of Lemma 6

Additionally wlog consider  $X_i > X'_i$  (the roles of  $i$  and  $i'$  can be reversed in the following definitions otherwise) and define the auxiliary variables

$$a_i(j) \triangleq \frac{B(r(X_i(j)) + 1) - X_i(j)}{2X^{\max}/(k-1)} \text{ and } b_i(j) \triangleq \frac{X'_i(j) - B(r(X'_i(j)))}{2X^{\max}/(k-1)}$$

$$Z_i(j) = \begin{cases} 0 & \text{w.p. } a_i(j) + b_i(j) \\ 1 & \text{otherwise,} \end{cases}$$

Further define

$$L_{ij} \triangleq |Y_i(j) - Y_i^{\otimes n}(j)| = Z_i(j) \text{ if } (i, j) \in S \quad (21)$$

Otherwise if  $(i, j) \notin S$  or equivalently  $r(X_i(j)) \neq r(X'_i(j))$ , we sample the bins independently and the random variables are defined as

$$Y_i(j) = \begin{cases} r(X_i(j)) + 1 & \text{w.p. } \frac{X_i(j) - B(r(X_i(j)))}{B(r(X_i(j)) + 1) - B(r(X_i(j)))} \\ r(X_i(j)) & \text{otherwise.} \end{cases}$$

$$Y_i^{\otimes n}(j) = \begin{cases} r(X'_i(j)) + 1 & \text{w.p. } \frac{X'_i(j) - B(r(X'_i(j)))}{B(r(X'_i(j)) + 1) - B(r(X'_i(j)))} \\ r(X'_i(j)) & \text{otherwise,} \end{cases}$$

Additionally wlog consider  $X_i > X'_i$  (the roles of  $i$  and  $i'$  can be reversed in the following definitions otherwise) and define the auxiliary variables

$$a_i(j) \triangleq \frac{X_i(j) - B(r(X_i(j)))}{2X^{\max}/(k-1)} \text{ and } b_i(j) \triangleq \frac{B(r(X'_i(j)) + 1) - X'_i(j)}{2X^{\max}/(k-1)}$$

$$Z_i(j) = \begin{cases} 0 & \text{w.p. } 1 - a_i(j) - b_i(j) + a_i(j)b_i(j) \\ 1 & \text{w.p. } a_i(j) + b_i(j) - 2a_i(j)b_i(j) \\ 2 & \text{otherwise,} \end{cases}$$

In this case define  $L_{i,j} \triangleq r(X_i(j)) - r(X'_i(j)) + 1 + Z_i(j)$  and note that

$$|Y_i(j) - Y_i^{\otimes n}(j)| \leq L_{ij} \quad (22)$$

With these definitions, it can be seen that the marginal distributions of  $Y_i(j), Y_i^{\otimes n}(j)$  are equal to the marginal distributions of  $U_i^X(j), U_i^{X^{\otimes n}}(j)$  respectively. Further note that since  $X'_i = X_i$  for all  $i \in [1, n-1]$  we have that  $Y_i = Y_i^{\otimes n}$  w.p. 1 for all  $i \in [1, n-1]$ . Therefore

$$\left\| \sum_i Y_i - \sum_i Y_i^{\otimes n} \right\|_q^q = \|Y_n - Y_n^{\otimes n}\|_q^q \leq \sum_j L_{nj}^q,$$

where the inequality follows from (21) and (22). We wish to bound the RHS above. To that end consider the following claim which follows from the definitions.

**Claim 1.**

$$Z_i(j) \leq 2 \text{ w.p. } 1$$

$$\mathbb{E}[Z_i(j)] = \begin{cases} a_i(j) + b_i(j) & \text{if } (i, j) \notin S \\ 1 - (a_i(j) + b_i(j)) & \text{otherwise} \end{cases}$$

$$\mathbb{E}[Z_i(j) - \mathbb{E}[Z_i(j)]^2] \leq \begin{cases} a_i(j) + b_i(j) & \text{if } (i, j) \notin S \\ 1 - (a_i(j) + b_i(j)) & \text{otherwise} \end{cases} = \mathbb{E}[Z_i(j)]$$

$$\mathbb{E}[Z_i(j) - \mathbb{E}[Z_i(j)]^4] \leq 4\mathbb{E}[Z_i(j) - \mathbb{E}[Z_i(j)]^2] \leq 4\mathbb{E}[Z_i(j)].$$



Further note that

$$\sum_j \mathbb{E}[Z_n(j)] = \sum_{(n,j) \notin S} (a_i(j) + b_i(j)) + \sum_{(n,j) \in S} 1 - (a_i(j) + b_i(j)) \leq \frac{\|X_n - X'_n\|_1}{2X^{\max}/(k-1)}. \quad (23)$$

A direct application of Bernstein's Inequality gives us that with probability at least  $1 - \delta/2$

$$\sum_j Z_n(j) \leq \mathbb{E}[\sum_j Z_n(j)] + \sqrt{2\mathbb{E}[\sum_j Z_n(j)] \log(2/\delta)} + \frac{4}{3} \log(2/\delta). \quad (24)$$

This gives us that

$$\begin{aligned} \sum_j |Y_n(j) - Y_n^{\otimes}(j)| &\stackrel{a}{\leq} \sum_j L_{nj} \\ &\stackrel{b}{\leq} \sum_{(i,j) \in S} Z_i(j) + \sum_{(i,j) \notin S} (r(X_i(j)) - r(X'_i(j)) + 1 + Z_i(j)) \\ &\stackrel{c}{\leq} \frac{\|X_n - X'_n\|_1}{2X^{\max}/(k-1)} + \sqrt{2 \frac{\|X_n - X'_n\|_1}{2X^{\max}/(k-1)} \log(2/\delta)} + \frac{4}{3} \log(2/\delta) \end{aligned}$$

where  $a, b$  follow from [\(21\)](#) and [\(22\)](#) and  $c$  follows from Claim [1](#) and [\(23\)](#). This proves the  $\ell_1$  norm bound.

We now focus on the  $\ell_2$  norm case. For this we note that

$$\forall(i, j) \quad L_{ij} = \begin{cases} \frac{X_i(j) - X'_i(j)}{2X^{\max}/(k-1)} + Z_i(j) - \mathbb{E}[Z_i(j)] & \text{if } X_i(j) \geq X'_i(j) \\ \frac{X'_i(j) - X_i(j)}{2X^{\max}/(k-1)} + Z_i(j) - \mathbb{E}[Z_i(j)] & \text{if } X_i(j) < X'_i(j). \end{cases}$$

Therefore

$$\sqrt{\sum_j L_{nj}^2} = \sqrt{\sum_j \left( \frac{X_i(j) - X'_i(j)}{2X^{\max}/(k-1)} \right)^2} + \sqrt{\sum_j (Z_n(j) - \mathbb{E}Z_n(j))^2}. \quad (25)$$

We now bound  $\sqrt{\sum_j (Z_n(j) - \mathbb{E}Z_n(j))^2}$ . We can now apply Bernstein's inequality on the random variable  $(Z_n(j) - \mathbb{E}Z_n(j))^2$  to get that with probability at least  $1 - \delta/2$

$$\sum_j (Z_n(j) - \mathbb{E}Z_n(j))^2 \leq \sum_j \mathbb{E}[Z_{nj}] + \sqrt{8 \sum_j \mathbb{E}[Z_{nj}] \log(2/\delta)} + \frac{4}{3} \log(2/\delta), \quad (26)$$

where the RHS uses Claim [1](#) for bounding expectation and variance.

Therefore combining [\(25\)](#) and [\(26\)](#), we get that

$$\begin{aligned} \|Y_n - Y'_n\|_2 &\leq \sqrt{\sum_j L_{nj}^2} \\ &\leq \frac{\|X_n - X'_n\|_2}{2X^{\max}/(k-1)} + \sqrt{\frac{\|X_n - X'_n\|_1}{2X^{\max}/(k-1)} + \sqrt{8 \left( \frac{\|X_n - X'_n\|_1}{2X^{\max}/(k-1)} \right) \log(2/\delta)} + \frac{4}{3} \log(2/\delta)}. \end{aligned}$$

The proof is finished using a union bound. □

## E Quantization with Rotation

We prove Theorem 4 here.

### Differential Privacy

Given any two neighboring data sets  $X = \{X_1, \dots, X_n\}$ ,  $X_{\otimes n} = \{X_1, \dots, X'_n\}$  we define a set of good rotations  $U_{\text{good}}$  as follows

$$U_{\text{good}} = \left\{ R \in U \mid \forall i \in [n] \quad \|RX_i\|_{\infty} \leq \frac{2\sqrt{\log(\frac{2nd}{\delta})}D_2}{\sqrt{d}}, \|RX'_n\|_{\infty} \leq \frac{2\sqrt{\log(\frac{2nd}{\delta})}D_2}{\sqrt{d}} \right\}$$

where  $U$  is the set of  $d \times d$  orthonormal matrices. The following lemma follows from [3]. We note that similar analysis holds for uniformly sampled  $R$  over real domain and we refer the reader to [10] for details.

**Lemma 8** ([3]).

$$P(HA \in U_{\text{good}}) \geq 1 - \delta$$

Let  $\text{Rot}(\pi, HA)(X)$ ,  $\text{Rot}(\pi, HA)(X_{\otimes n})$  represent the random output of the protocol  $\text{Rot}(\pi, HA)$  on  $X$ ,  $X_{\otimes n}$  respectively and let  $S$  be any subset of the output range of  $\text{Rot}(\pi, HA)$ . Given  $\delta$  let  $\varepsilon$  be given by Theorem 1 with sensitivity parameters  $\{\Delta_1(X^{\text{max}}, D), \Delta_2(X^{\text{max}}, D), \Delta_{\infty}(X^{\text{max}}, D)\}$ . Given a set of vectors  $V$  and a rotation matrix  $R$  define  $R \cdot V = \{Rv \mid v \in V\}$ .

$$\begin{aligned} & Pr(\text{Rot}(\pi, HA)(X) \in S) \\ & \leq \int_{R \in U_{\text{good}}} (Pr(\text{Rot}(\pi_{sk}(\text{Bin}(m, p)), HA)(X) \in S \mid R)) dR + Pr(R \notin U_{\text{good}}) \\ & = \int_{R \in U_{\text{good}}} Pr(\text{Rot}(\pi_{sk}(\text{Bin}(m, p)), HA)(R \cdot X) \in R \cdot S) dR + Pr(R \notin U_{\text{good}}) \\ & \stackrel{a}{\leq} \int_{R \in U_{\text{good}}} (e^{\varepsilon} Pr(\pi_{sk}(\text{Bin}(m, p))(R \cdot X_{\otimes n}) \in R \cdot S) + 2\delta) dR + Pr(R \notin U_{\text{good}}) \\ & = \int_{R \in U_{\text{good}}} e^{\varepsilon} (Pr(\text{Rot}(\pi_{sk}(\text{Bin}(m, p)), HA)(X_{\otimes n}) \in S \mid R) + 2\delta) dR + Pr(R \notin U_{\text{good}}) \\ & \leq e^{\varepsilon} Pr(\text{Rot}(\pi_{sk}(\text{Bin}(m, p)), HA)(X_{\otimes n}) \in S) + 3\delta \end{aligned}$$

$a$  follows from  $(\varepsilon, 2\delta)$  differential privacy guarantee for  $\pi_{sk}(\text{Bin}(m, p))$  from Theorem 3 and noting that  $R \in U_{\text{good}}$  in the integral. Hence  $\text{Rot}(\pi_{sk}(\text{Bin}(m, p)))$  offers  $(\varepsilon, 3\delta)$  differential-privacy.

### Mean Square Error

The bound on the MSE can be observed by noting that the total change the entire protocol can cause on any individual client vector is bounded by  $2D$  in  $\ell_2$  norm, therefore the total MSE can be at most  $4D^2$  irrespective of the choice of rotation. Therefore

$$\begin{aligned} \mathcal{E}(\text{Rot}(\pi_{sk}(\text{Bin}(m, p))), HA) &= \mathcal{E}(\text{Rot}(\pi_{sk}(\text{Bin}(m, p))), HA \mid R \in U_{\text{good}}) + \\ & \quad \mathcal{E}(\text{Rot}(\pi_{sk}(\text{Bin}(m, p))), HA \mid R \notin U_{\text{good}}) \\ & \stackrel{a}{\leq} \mathcal{E}(\text{Rot}(\pi_{sk}(\text{Bin}(m, p))), HA \mid R \in U_{\text{good}}) + 4D^2\delta^2 \\ & \stackrel{b}{\leq} \frac{2 \log \frac{2nd}{\delta} \cdot D^2}{n(k-1)^2} + \frac{8 \log \frac{2nd}{\delta}}{n} \cdot \frac{mp(1-p)D^2}{(k-1)^2} + 4D^2\delta^2 \end{aligned}$$

$a$  follows from the argument above and  $b$  follows from the MSE guarantee in Theorem 3 and by noting that the rotation is in  $U_{\text{good}}$ .
